# Supplementary material
Source: PubMed Central journal article supplement (PMC5047798)
Supplement: supp_4.3.E398_2016-0007-2-at.pdf [file supp_4.3.E398_2016-0007-2-at.pdf]

## **Appendix 2 (as supplied by the authors): Explications du projet de recherche et de la collecte de données à effectuer par les archivistes**

La Chaire de recherche en médecine d'urgence Université Laval - Hôtel-Dieu de Lévis mène un projet de recherche dont l'objectif principal est de dresser un portrait des 26 unités d'urgence en milieu rural au Québec. Il s'agit de la plus vaste étude sur ce sujet jamais réalisée au Canada. Ultiment, notre objectif est de contribuer à l'amélioration de la qualité et de l'accessibilité des soins et services dans les établissements ruraux.

Le projet de recherche qui comporte 3 phases a été approuvé par votre directeur général. Nous sommes actuellement rendus à la deuxième phase du projet. Depuis le début de la collecte, différents acteurs de votre établissements ont participé au projet, tel que l'infirmière-chef, le chef du département de l'urgence (CDU), le directeur des soins infirmiers (DSI) et le directeur des services professionnels (DSP).

Un des objectifs de la deuxième phase du projet de recherche vise à évaluer les relations entre la mise en place des recommandations et les indicateurs de qualité de soins. Votre collaboration est sollicitée pour la réalisation de cet objectif précis. Au total, 14 indicateurs ( et sous catégories) de qualité de soins ont été identifiés. Pour ce faire, il est nécessaire de documenter les démarches nécessaires pour suivre chaque indicateur. Dans les pages suivantes, tous les indicateurs ont été définis, des banques de données pour la collecte ont été suggérées et le nombre de cas par année(s) de référence ont été identifiés. Il est attendu que les banques de données en place ou les informations contenues dans les dossiers médicaux ne permettront pas de mesurer tous les indicateurs. Au final, il sera possible de présenter les données liées aux indicateurs qui sont disponibles et de mettre en lumière les indicateurs dont le suivi s'avère impossible ou du moins complexe dans votre établissement.

Pour effectuer la collecte des données, un fichier Excel a été préparé et joint à ce document. Chaque indicateur est nommé et le nombre de cas par année(s) de référence est inscrit. Pour chaque indicateur, une colonne est prévue pour écrire la ou les banques de données que vous avez utilisées. Une autre est prévue pour indiquer votre réponse à chaque indicateur. Une dernière est prévue pour vos commentaires. Dans le cas où l'information pour un indicateur n'est pas disponible, il est important de le spécifier dans la colonne commentaires associée à l'indicateur en question.

**\*\*\* Il est à noter que les informations qui sont actuellement en jaune dans les pages suivantes devront être précisées et validées lors de la phase 1 de l'étude.**

## Explications des indicateurs de qualité

### Catégorie: Durée des séjours

#### Délai moyen entre l'arrivée à l'unité d'urgence et le temps du départ physique de l'unité d'urgence

Cas par année de référence: 2010

Délai moyen pour tous les patients (civières et ambulants).

L'arrivée à l'unité d'urgence correspond à l'inscription à l'unité d'urgence.

Le départ physique correspond à l'heure inscrite sur l'horaire informatique.

#### Délai entre l'arrivée à l'unité d'urgence et le temps du départ physique de l'unité d'urgence selon l'échelle de triage (ÉTG)

Cas par année de référence: 2010

Délai moyen pour tous les patients (civières et ambulants).

L'arrivée à l'unité d'urgence correspond à l'inscription à l'unité d'urgence.

Le départ physique correspond à l'heure inscrite sur l'horaire informatique.

Déterminer le délai moyen pour chaque niveau de l'échelle de triage (échelles 1 à 5).

### Catégorie: Sécurité des patients

#### Pourcentage de patients pédiatriques qui ont fait un retour non planifié à l'unité d'urgence et qui ont été admis à l'hôpital, et ce, 48 ou 72 heures après avoir été vus et libérés de l'unité d'urgence

Cas par année de référence: 2010

Considérer les patients pédiatriques seulement (0 à 18 ans).

« Un retour non planifié à l'urgence » est un retour spontané du patient, c'est-à-dire de sa propre initiative, sans convocation par le médecin.

Considérer uniquement les délais de 48 à 72 heures après le premier départ de l'unité d'urgence.

« Qui ont été admis à l'hôpital » à la suite de leur 2<sup>e</sup> consultation signifie que le patient a été hospitalisé.

Finalement, il s'agit de tous les patients qui sont réadmis à l'urgence et hospitalisés.

Le pourcentage se calcule de la façon suivante :

Nombre de patients pédiatriques qui ont fait un retour non planifié à l'unité d'urgence et qui ont été admis à l'hôpital, et ce, 48 ou 72 heures après avoir été vus et libérés de l'unité d'urgence

X 100

Nombre total de patients pédiatriques qui ont consulté à l'unité d'urgence

**Pourcentage de patients adultes qui ont fait un retour non planifié à l'unité d'urgence et qui ont été admis à l'hôpital, et ce, 48 ou 72 heures après avoir été vus et libérés de l'unité d'urgence**

Cas par année de référence: 2010

Considérer les patients adultes seulement (18 ans et plus).

« Un retour non planifié à l'urgence » est un retour spontané du patient, c'est-à-dire de sa propre initiative, sans convocation par le médecin.

Considérer uniquement les délais de 48 à 72 heures après le premier départ de l'unité d'urgence.

« Qui ont été admis à l'hôpital » à la suite de leur 2<sup>e</sup> consultation signifie que le patient a été hospitalisé.

Finalement, il s'agit de tous les patients qui sont réadmis à l'urgence et hospitalisés.

Le pourcentage se calcule de la façon suivante :

$$\frac{\text{Nombre de patients adultes qui ont fait un retour non planifié à l'unité d'urgence et qui ont été admis à l'hôpital, et ce, 48 ou 72 heures après avoir été vus et libérés de l'unité d'urgence}}{\text{Nombre total de patients adultes qui ont consulté à l'unité d'urgence}} \times 100$$

**Catégorie: Gestion de la douleur**

**Pourcentage de patients souffrant de maux de tête ayant été libérés de l'unité d'urgence, mais qui ont été admis à l'hôpital dans les 14 jours subséquents en raison d'une hémorragie sous-arachnoïdienne (HSA)**

Cas par année de référence: 100 cas (2005-2010)

Pour identifier cet indicateur de qualité, il faut d'abord identifier les cas d'hémorragie sous-arachnoïdienne (HSA) hospitalisé. Ensuite, il faut regarder si le patient a consulté à l'unité d'urgence pour un mal de tête dans les 14 jours précédents son hospitalisation pour l'HSA.

Termes/symptômes/diagnostics correspondant aux maux de tête : céphalée, migraine, algie vasculaire de la face, névralgie du trijumeau, névralgie d'Arnold, etc.

Indiquer dans la section commentaire de cet indicateur de qualité les termes/symptômes/diagnostics utilisés pour votre recherche.

Le pourcentage se calcule de la façon suivante :

$$\frac{\text{Nombre de patients souffrant de maux de tête ayant été libérés de l'unité d'urgence, mais qui ont été admis à l'hôpital dans les 14 jours subséquents en raison d'une hémorragie sous-arachnoïdienne (HSA)}}{\text{Nombre total de patients souffrant de HSA}} \times 100$$

## **Délai avant de recevoir la première dose d'analgésique dans toutes les conditions de douleur requérant l'analgésie**

Cas par année de référence: 100 cas (2010)

Délai entre l'inscription à l'unité d'urgence et le moment où le patient reçoit sa première dose d'analgésique.

Considérer tous les **analgésiques**, par exemple Tylenol, Advil, Ibuprofène, Codéine, Dilaudid, Morphine, etc.

Indiquer dans la section commentaire de cet indicateur de qualité les analgésiques utilisés pour votre recherche.

**Préciser ce qu'on entend par « conditions de douleur ».**

## **Catégorie: Pédiatrie**

### **Pourcentage de patients pédiatriques (âgés de 0 à 28 jours) ayant de la fièvre qui ont reçu un bilan septique complet**

Cas par année de référence: 100 cas (2005-2010)

Considérer la fièvre comme une température supérieure ou égale à 38,5°C.

**Préciser la définition du bilan septique complet.**

Le pourcentage se calcule de la façon suivante :

$$\frac{\text{Nombre de patients pédiatriques (âgés de 0 à 28 jours) ayant de la fièvre qui ont reçu un bilan septique complet}}{\text{Nombre de patients pédiatriques (âgés de 0 à 28 jours) ayant de la fièvre}} \times 100$$

### **Pourcentage de patients pédiatriques (âgés de 0 à 28 jours) qui ont reçu des antibiotiques à large spectre intraveineux**

Cas par année de référence: 100 cas (2005-2010)

**Préciser la liste des antibiotiques à large spectre.**

Le pourcentage se calcule de la façon suivante :

$$\frac{\text{Nombre de patients pédiatriques (âgés de 0 à 28 jours) qui ont reçu des antibiotiques à large spectre intraveineux}}{\text{Nombre de patients pédiatriques (âgés de 0 à 28 jours) ayant de la fièvre}} \times 100$$

**Pourcentage de patients pédiatriques (âgés de 3 mois à 3 ans) souffrant du croup qui ont été traités avec des stéroïdes**

Cas par année de référence: 100 cas (2005-2010)

Le croup est une laryngite aiguë.

Préciser la liste des des stéroïdes.

Le pourcentage se calcule de la façon suivante :

$$\frac{\text{Nombre de patients pédiatriques (âgés de 3 mois à 3 ans) souffrant du croup qui ont été traités avec des stéroïdes}}{\text{Nombre de patients pédiatriques (âgés de 3 mois à 3 ans) souffrant du croup}} \times 100$$

**Catégorie: Cardiologie**

**Pourcentage de patients avec un infarctus aigu du myocarde qui ont reçu un traitement thrombolytique ou une angioplastie interventionnelle**

Cas par année de référence: 2010

Considérer le syndrome coronaire aigu (SCA) comme un diagnostic similaire à infarctus aigu du myocarde.

Préciser la liste des thrombolytiques.

Le pourcentage se calcule de la façon suivante :

$$\frac{\text{Nombre de patients avec un infarctus aigu du myocarde avec élévation du segment ST qui ont reçu un traitement thrombolytique ou une angioplastie interventionnelle}}{\text{Nombre de patients avec un infarctus aigu du myocarde avec élévation du segment ST}} \times 100$$

**Catégorie: Appareil respiratoire**

**Pourcentage de patients (selon différents groupes d'âge) souffrant d'asthme qui ont reçu des corticostéroïdes à l'unité d'urgence et lorsqu'ils ont été libérés (si libérés)**

Cas par année de référence: 100 cas (2010)

Considérer tous les patients qui ont consulté à l'urgence, qui ont été traités à l'urgence, mais qui n'ont pas été hospitalisés.

Préciser les groupes d'âgés à considérer.

Le pourcentage se calcule de la façon suivante :

$$\frac{\text{Nombre de patients (selon chaque groupe d'âge) souffrant d'asthme qui ont reçu des corticostéroïdes à l'unité d'urgence et lorsqu'ils ont été libérés (si libérés)}}{\text{Nombre de patients (selon chaque groupe d'âge) souffrant d'asthme}} \times 100$$

### Catégorie: AVC

#### Pourcentage de patients avec un AVC en phase aigüe qui ont reçu un traitement thrombolytique

Cas par année de référence: 100 cas (2005-2010)

Le pourcentage se calcule de la façon suivante :

$$\frac{\text{Nombre de patients avec un AVC en phase aigüe qui ont reçu un traitement thrombolytique}}{\text{Nombre de patients avec un AVC}} \times 100$$

### Catégorie: Sepsis/infection

#### Délai d'administration d'antibiotiques pour les patients avec la bactérie de la méningite

Cas par année de référence: 50 cas (2005-2010)

Délai entre l'inscription à l'unité d'urgence et l'administration de l'antibiothérapie.

Préciser la liste des antibiotiques.

#### Pourcentage de patients avec un sepsis sévère ou un choc septique qui ont reçu un antibiotique à large spectre dans les 4 heures suivant leur arrivée à l'unité d'urgence

Cas par année de référence: 100 cas (2005-2010)

Préciser la définition de sepsis sévère et de choc septique.

Préciser la liste des antibiotiques à large spectre.

Le pourcentage se calcule de la façon suivante :

$$\frac{\text{Nombre de patients avec un sepsis sévère ou un choc septique qui ont reçu un antibiotique à large spectre dans les 4 heures suivant leur arrivée à l'unité d'urgence}}{\text{Nombre de patients avec un sepsis sévère ou un choc septique}} \times 100$$
