# Supplementary material
Source: PubMed Central journal article supplement (PMC5047798)
Supplement: supp_4.3.E398_2016-0007-3-at.pdf [file supp_4.3.E398_2016-0007-3-at.pdf]

**Appendix 3 (as supplied by the authors): Databases searched for QCI measurement**

| <b>Database name</b> | <b>Description</b>                                                                                                                                                                                                                                                                                                                                                                                                                                                                                                                                 |
|----------------------|----------------------------------------------------------------------------------------------------------------------------------------------------------------------------------------------------------------------------------------------------------------------------------------------------------------------------------------------------------------------------------------------------------------------------------------------------------------------------------------------------------------------------------------------------|
| Ariane               |                                                                                                                                                                                                                                                                                                                                                                                                                                                                                                                                                    |
| Clinibase            | Information system consisting of several integrated modules, including appointment scheduling, admission, care and services management, and specialized modules such as the bed status board, professional activity management and record management. It is designed specifically for hospital centers and multipurpose facilities.                                                                                                                                                                                                                |
| Cortex               | NA                                                                                                                                                                                                                                                                                                                                                                                                                                                                                                                                                 |
| Impromptu            | NA                                                                                                                                                                                                                                                                                                                                                                                                                                                                                                                                                 |
| MedEcho              | Contains data on hospital stays occurred in Quebec hospitals providing general and specialized care.                                                                                                                                                                                                                                                                                                                                                                                                                                               |
| Med - GPS            | Based on the principles of Lean Six Sigma, Med-GPS is a business intelligence solution for data mining and management. Designed with the concept of continuous improvement in mind, Med-GPS allows users to identify areas where clinical and financial performance can be improved, measure actions, and respond quickly to changing trends throughout the care continuum. With its strong business analytics and real-time performance analysis capabilities, Med-GPS allows to identify profitable business solutions and impactful strategies. |
| MediClinic           | A complete electronic health record (EHR) system, including clinical data repository and transactional clinical portal.                                                                                                                                                                                                                                                                                                                                                                                                                            |
| MediLabo             | NA                                                                                                                                                                                                                                                                                                                                                                                                                                                                                                                                                 |
| MediPatient          | Provide full patient record integration, tracking, and reporting. Uniquely identify patients, while supporting multiple records, search a master patient index (MPI), share patient information securely across public and regional health facilities, and create an appointment system to view physician availability at a glance.                                                                                                                                                                                                                |
| Radimage             | Radimage is a robust radiology information system that enables healthcare organizations to streamline workflow processes in radiology, electrophysiology, endoscopy, hemodynamics, vascular laboratory, respiratory physiology and other departments.                                                                                                                                                                                                                                                                                              |
| RQSUCH               |                                                                                                                                                                                                                                                                                                                                                                                                                                                                                                                                                    |

| Database name | Description                                                                                                                                                                                                                                                                                                                                                                                                                                                                                                                                                                                                                                                                            |
|---------------|----------------------------------------------------------------------------------------------------------------------------------------------------------------------------------------------------------------------------------------------------------------------------------------------------------------------------------------------------------------------------------------------------------------------------------------------------------------------------------------------------------------------------------------------------------------------------------------------------------------------------------------------------------------------------------------|
| SIURGE        | Integrated emergency management system that features a triage module.                                                                                                                                                                                                                                                                                                                                                                                                                                                                                                                                                                                                                  |
| Stat - Dev    | NA                                                                                                                                                                                                                                                                                                                                                                                                                                                                                                                                                                                                                                                                                     |
| Stat – Urg    | Stat-Emergency is a technological solution that speeds up the decision-making process. Its quick accessibility to files and profiles of emergency patients can reduce costs and save valuable time, which benefits nurses, physicians, administrators and ultimately patients.                                                                                                                                                                                                                                                                                                                                                                                                         |
| Syphac        | Syphac is an advanced pharmacy information system that allows clinicians to efficiently follow the entire medication cycle while enabling clinical decision support                                                                                                                                                                                                                                                                                                                                                                                                                                                                                                                    |
| Med - Urge    | <p>As a high-performance software application developed by and for clinical experts (ED nurses and doctors), Med-Urge fully supports, in real time, all aspects of patient care in emergency departments, is easy to use and is evidence based.</p> <p>Med-Urge supports CTAS and CEDIS requirements with straight forward algorithms and treatment pathways suitable for assessing common complaints. This application meets the needs of every emergency department including adult and pediatric ED, fast tracks, walk-in clinics and urgent care centers, community hospitals, teaching hospitals, enterprise/multi-location hospital emergency departments and trauma centers</p> |
| Others        | NA                                                                                                                                                                                                                                                                                                                                                                                                                                                                                                                                                                                                                                                                                     |
